# Supplementary material for: Outdoor Temperature, Heart Rate and Blood Pressure in Chinese Adults: Effect Modification by Individual Characteristics
Source: PubMed Central journal article supplement (PMC4753475; doi:10.1038/srep21003), 2016-02-15
Supplement: srep21003-s1.pdf [file srep21003-s1.pdf]

# **Supplemental Material**

**Outdoor Temperature, Heart Rate and Blood Pressure in Chinese Adults: Effect  
Modification by Individual Characteristics**

Table S1. Thresholds(°C) for effects of temperature on HR, SBP and DBP

|                                       | HR   | SBP  | DBP  |
|---------------------------------------|------|------|------|
| <b>Whole</b>                          | 22   | 27   | 27   |
| <b>Age</b>                            |      |      |      |
| <44                                   | 23   | 24   | 24   |
| 45-64                                 | 25   | 27   | 27   |
| ≥ 65                                  | N.A. | N.A. | N.A. |
| <b>Gender</b>                         |      |      |      |
| Male                                  | N.A. | N.A. | N.A. |
| Female                                | 23   | 27   | 27   |
| <b>BMI</b>                            |      |      |      |
| <18.5                                 | 20   | 28   | 27   |
| 18.5-23.9                             | 22   | 27   | 27   |
| ≥23.9                                 | 24   | 27   | 27   |
| <b>Education level</b>                |      |      |      |
| Elementary or below                   | 23   | 25   | 23   |
| Middle school or above                | 24   | 27   | 27   |
| <b>Work Type</b>                      |      |      |      |
| Mental                                |      |      |      |
| Manual                                | 24   | 27   | 27   |
| <b>Physical Activity</b>              |      |      |      |
| Inactive                              | 23   | 27   | 27   |
| Active                                | 23   | 27   | 26   |
| <b>Income</b>                         |      |      |      |
| <¥800                                 | 24   | 27   | 27   |
| ≥¥800                                 |      |      |      |
| <b>Smoking status</b>                 |      |      |      |
| Never or former                       | 26   | 27   | 27   |
| Current but occasionally              | 23   | 26   | 26   |
| Current and often                     |      |      |      |
| <b>Salt Intake</b>                    |      |      |      |
| Low or medium                         | 24   | 27   | 27   |
| High                                  | 25   | 27   | 28   |
| <b>Drinking status</b>                |      |      |      |
| Never/former/current but occasionally | 24   | 27   | 27   |
| Current and often                     | 23   | 25   | 15   |
| <b>Hypertension</b>                   |      |      |      |
| No                                    | 24   | 27   | 27   |
| Yes                                   | 25   | 27   | 27   |
| <b>Hyperlipidemia</b>                 |      |      |      |
| No                                    | 24   | 27   | 27   |
| Yes                                   |      | 25   | 25   |

Table S2. The comparison of the thresholds of associations with cardiovascular systems (cardiovascular/cerebrovascular mortality, HR, SBP and DBP) in different Chinese cities

| City                      | Threshold (°C)                                    |                                                    |                                     |
|---------------------------|---------------------------------------------------|----------------------------------------------------|-------------------------------------|
|                           | Temperature-Cardiovascular Mortality Associations | Temperature-Cerebrovascular Mortality Associations | Temperature-HR/SBP/DBP Associations |
| Our study                 |                                                   |                                                    | 22/ 27/ 27                          |
| Harbin <sup>1</sup>       | 20.6                                              |                                                    |                                     |
| Changchun <sup>1</sup>    | 20.6                                              |                                                    |                                     |
| Shenyang <sup>1</sup>     | 21.5                                              |                                                    |                                     |
| Beijing <sup>1,2</sup>    | 24.9                                              |                                                    | 0.7 †                               |
| Tianjin <sup>1-3</sup>    | 24.5                                              | 0.6-25.1 *                                         | -0.6 †                              |
| Shijiazhuang <sup>1</sup> | 23.8                                              |                                                    |                                     |
| Jinan <sup>1</sup>        | 24.9                                              |                                                    |                                     |
| Zhengzhou <sup>1</sup>    | 25.9                                              |                                                    |                                     |
| Shanghai <sup>1,2</sup>   | 24.5                                              |                                                    | 26.9 †                              |
| Nanjing <sup>1</sup>      | 27.9                                              |                                                    |                                     |
| Suzhou <sup>4</sup>       | 26                                                |                                                    |                                     |
| Chengdu <sup>1</sup>      | 24.1                                              |                                                    |                                     |
| Chongqing <sup>1</sup>    | 29.2                                              |                                                    |                                     |
| Changsha <sup>1,5</sup>   | 25.1                                              | 10-29 ‡                                            |                                     |
| Wuhan <sup>2</sup>        |                                                   |                                                    | 25 †                                |
| Kunming <sup>1</sup>      | 23.3                                              |                                                    |                                     |
| Guangzhou <sup>1,2</sup>  | 29.0                                              |                                                    | 27.8 †                              |

\* The result was obtained from the 3<sup>rd</sup> literature. † The result was obtained from the 2<sup>nd</sup> literature.

‡ The result was obtained from 5<sup>th</sup> literature.

Abbreviations: HR: Heart Rate; SBP: Systolic Blood Pressure; DBP: Diastolic Blood Pressure

#### Reference:

1. Yang, J., Yin, P., Zhou, M. et al. Cardiovascular mortality risk attributable to ambient temperature in China. *Heart*, doi:10.1136/heartjnl-2015-308062 (2015).
2. Zhang, Y., Li, S., Pan, X. et al. The effects of ambient temperature on cerebrovascular mortality: An epidemiologic study in four climatic zones in China. *Environmental Health* 13, 24 (2014).
3. Guo, Y., Barnett, A. G., Pan, X. et al. The impact of temperature on mortality in Tianjin, China: A case–crossover design with a distributed lag non-linear model. *Environ. Health Perspect.* 119, 1719-1725 (2011).
4. Wang, C., Chen, R., Kuang, X. et al. Temperature and daily mortality in Suzhou, China: A time series analysis. *Sci. Total Environ.* 466-467, 985-990, doi:10.1016/j.scitotenv.2013.08.011 (2014).
5. Huang, J., Wang, J. & Yu, W. The lag effects and vulnerabilities of temperature effects on cardiovascular disease mortality in a subtropical climate zone in China. *Intl. J. Environ. Res. Publ. Health* 11, 3982-3994 (2014).

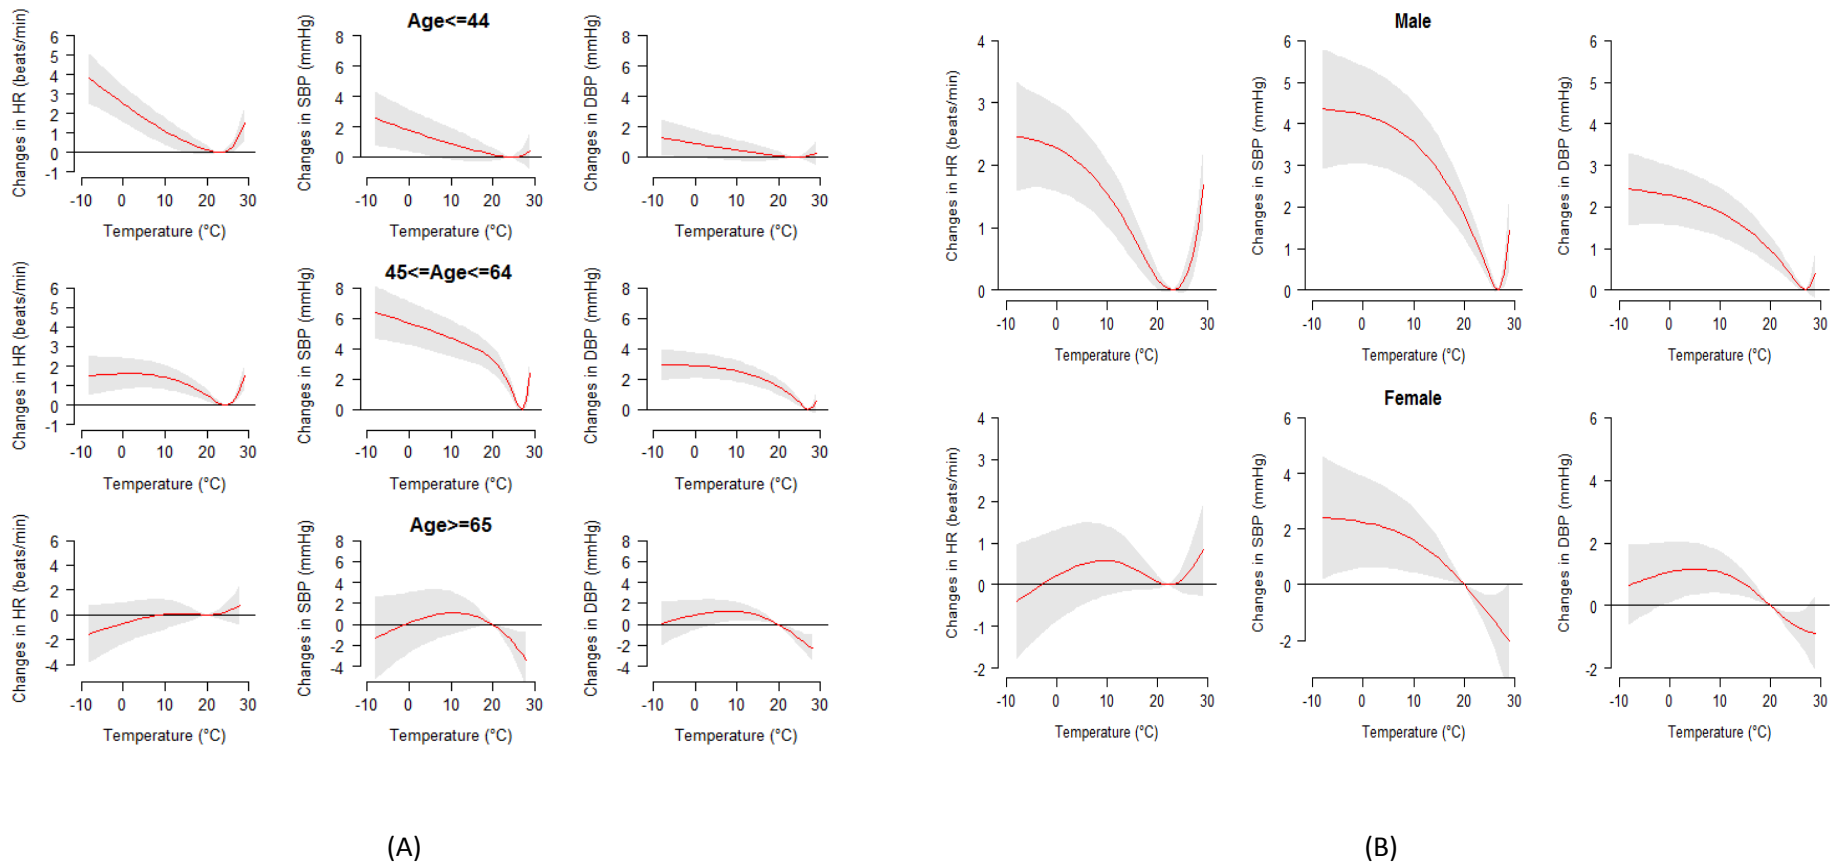

Figure S1. The estimated effects of 3-day moving average of mean temperature on HR, SBP and DBP among age groups (A) and gender (B)

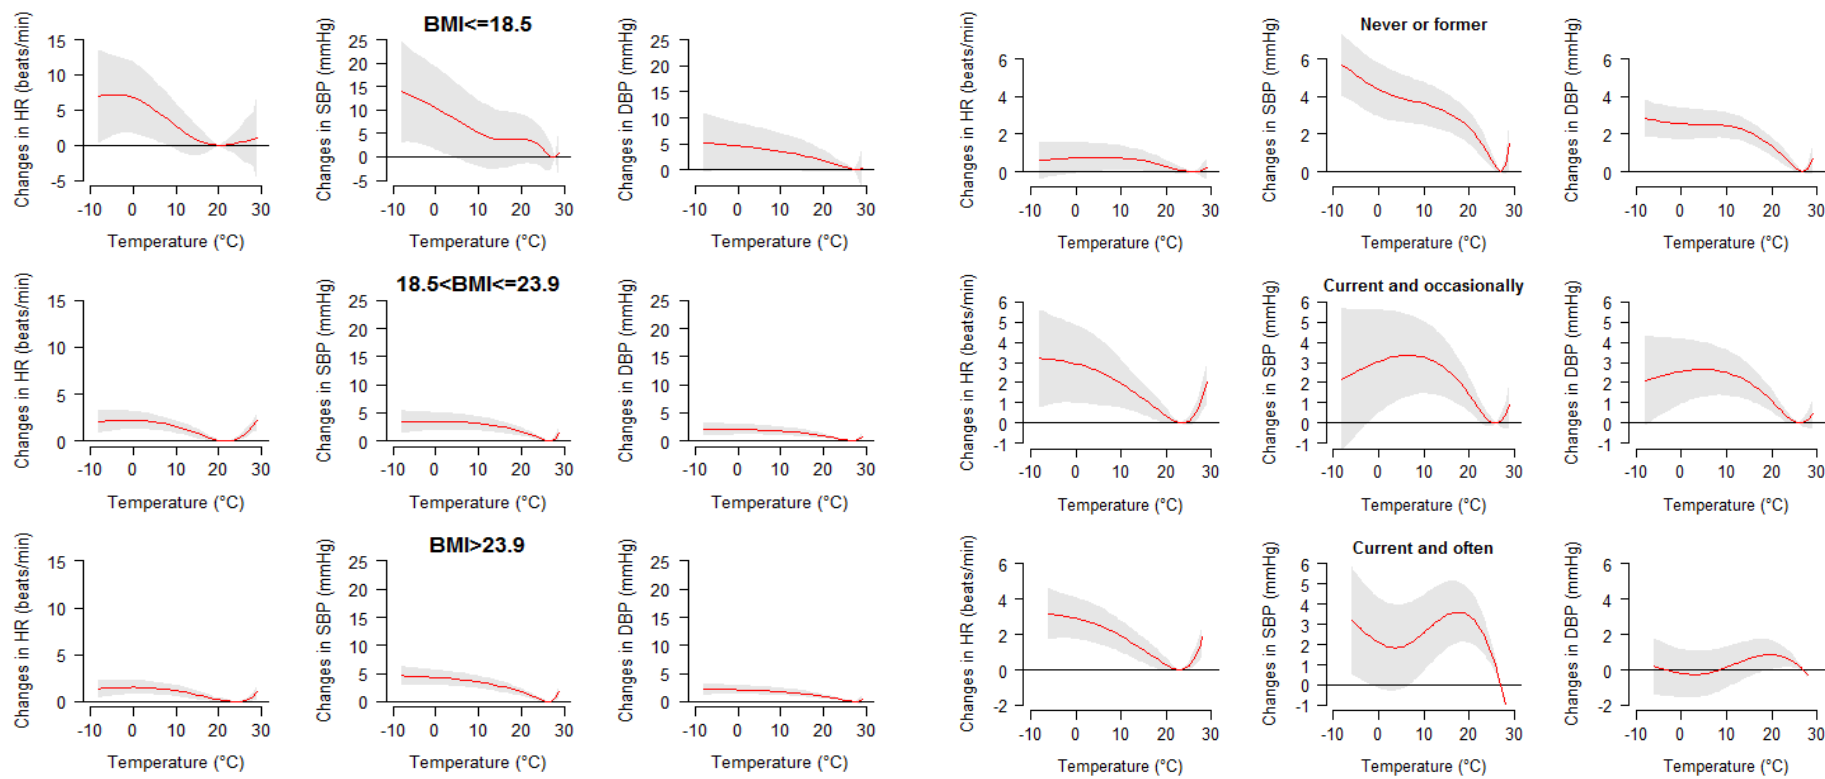

(A)

(B)

Figure S2. The estimated effects of 3-day moving average of mean temperature on HR, SBP and DBP among BMI groups (A) and people with different smoking habits (B)

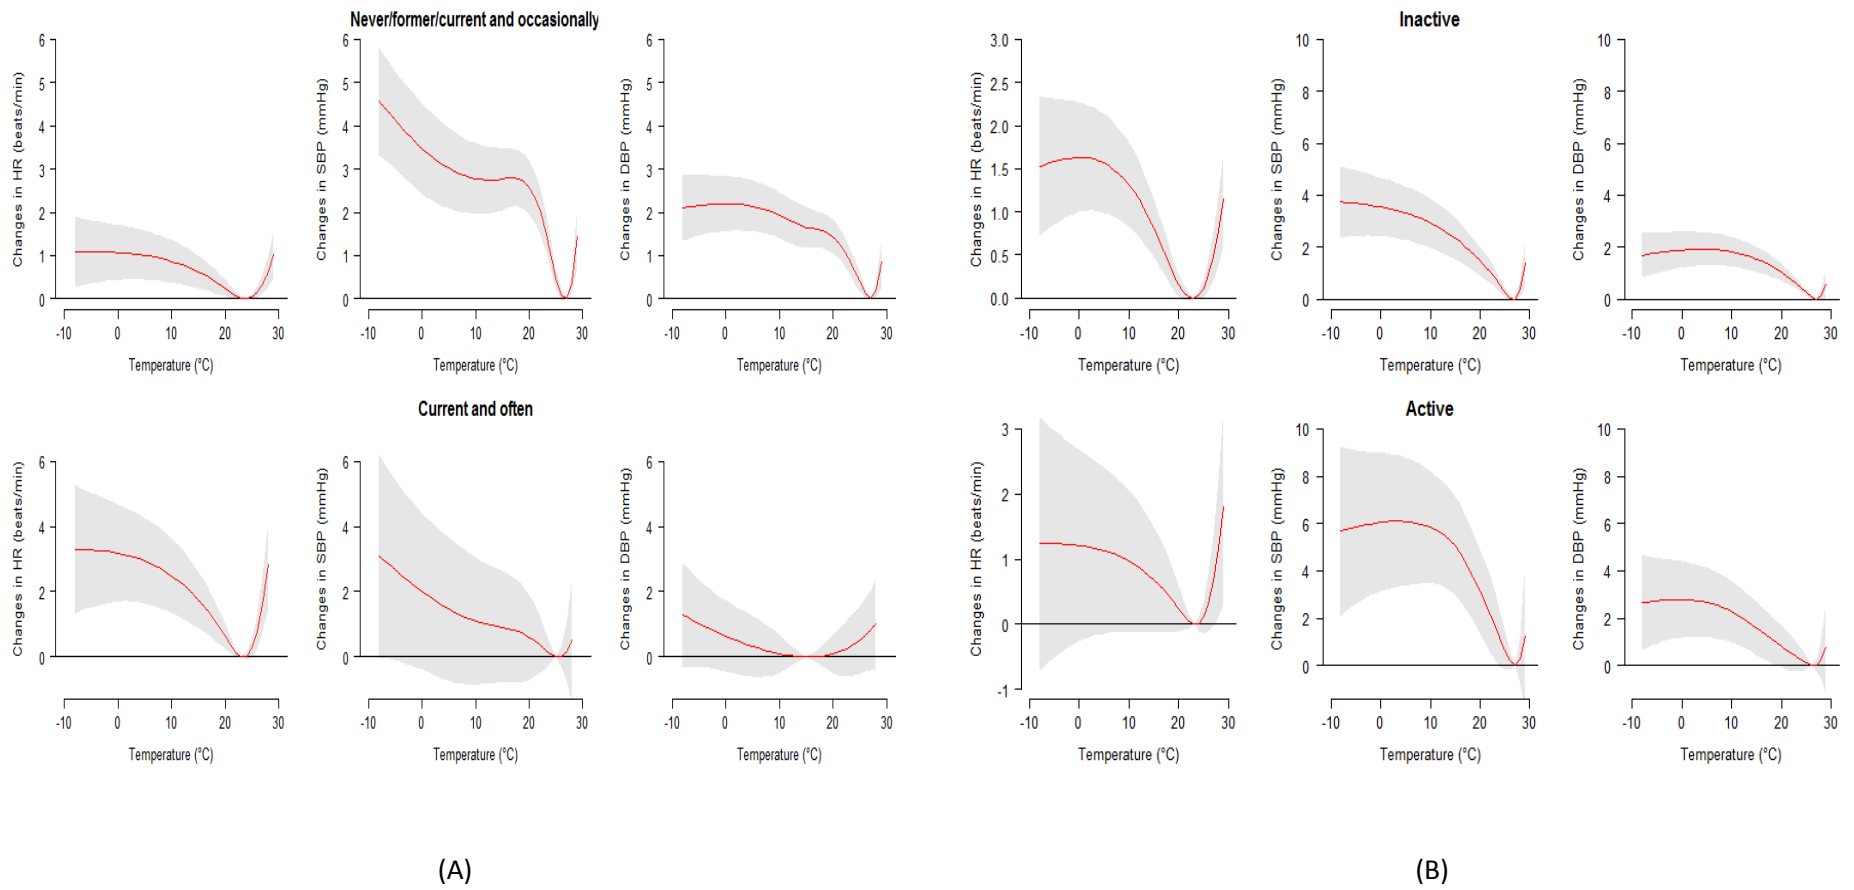

Figure S3. The estimated effects of 3-day moving average of mean temperature on HR, SBP and DBP among people with different drinking habits (A) and different physical activities (B)

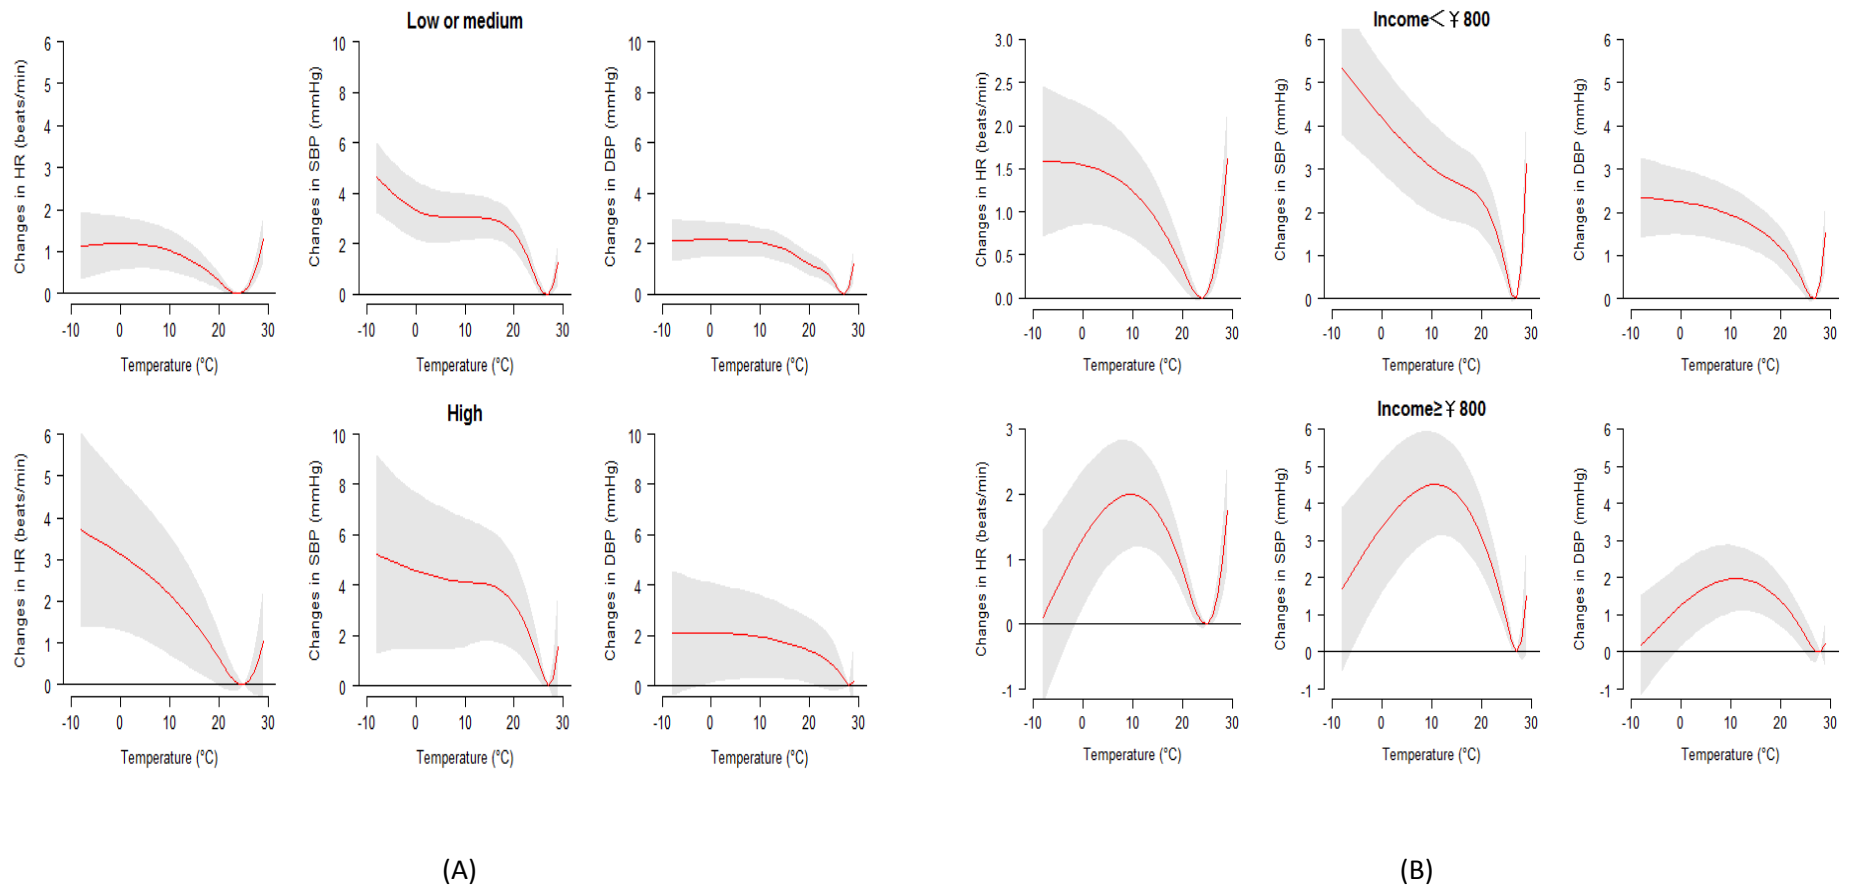

Figure S4. The estimated effects of 3-day moving average of mean temperature on HR, SBP and DBP among people with different salt intake (A) and different income (B)

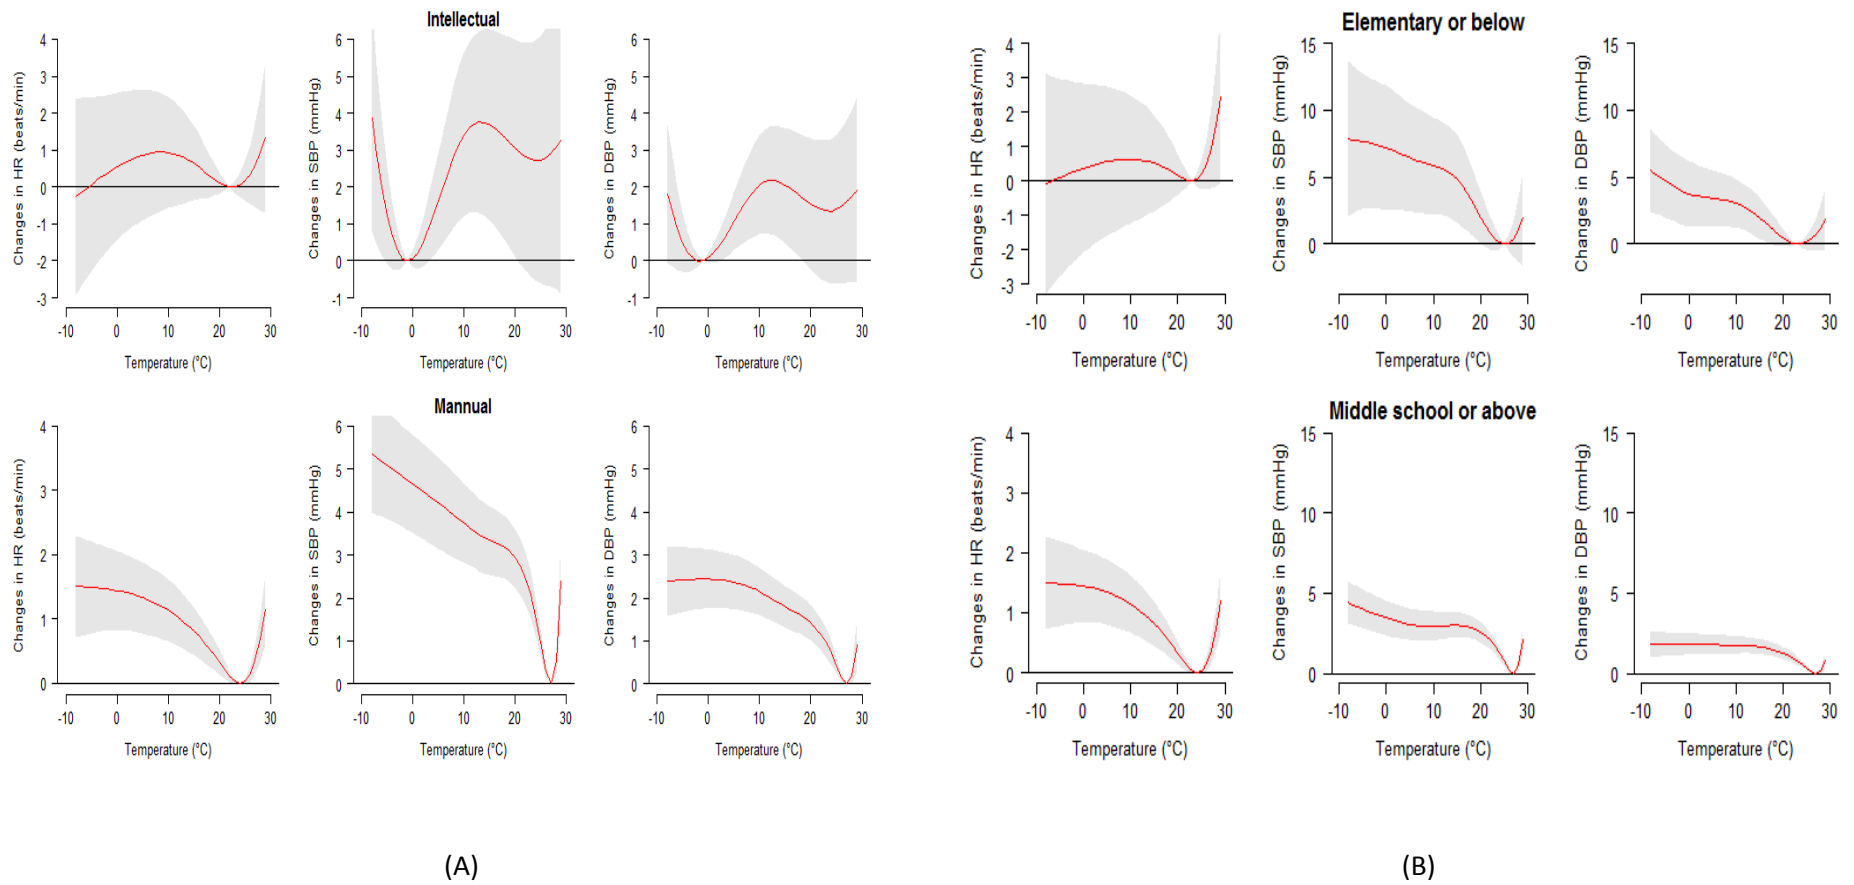

Figure S5. The estimated effects of 3-day moving average of mean temperature on HR, SBP and DBP among people with different work types (A) and different education levels (B)



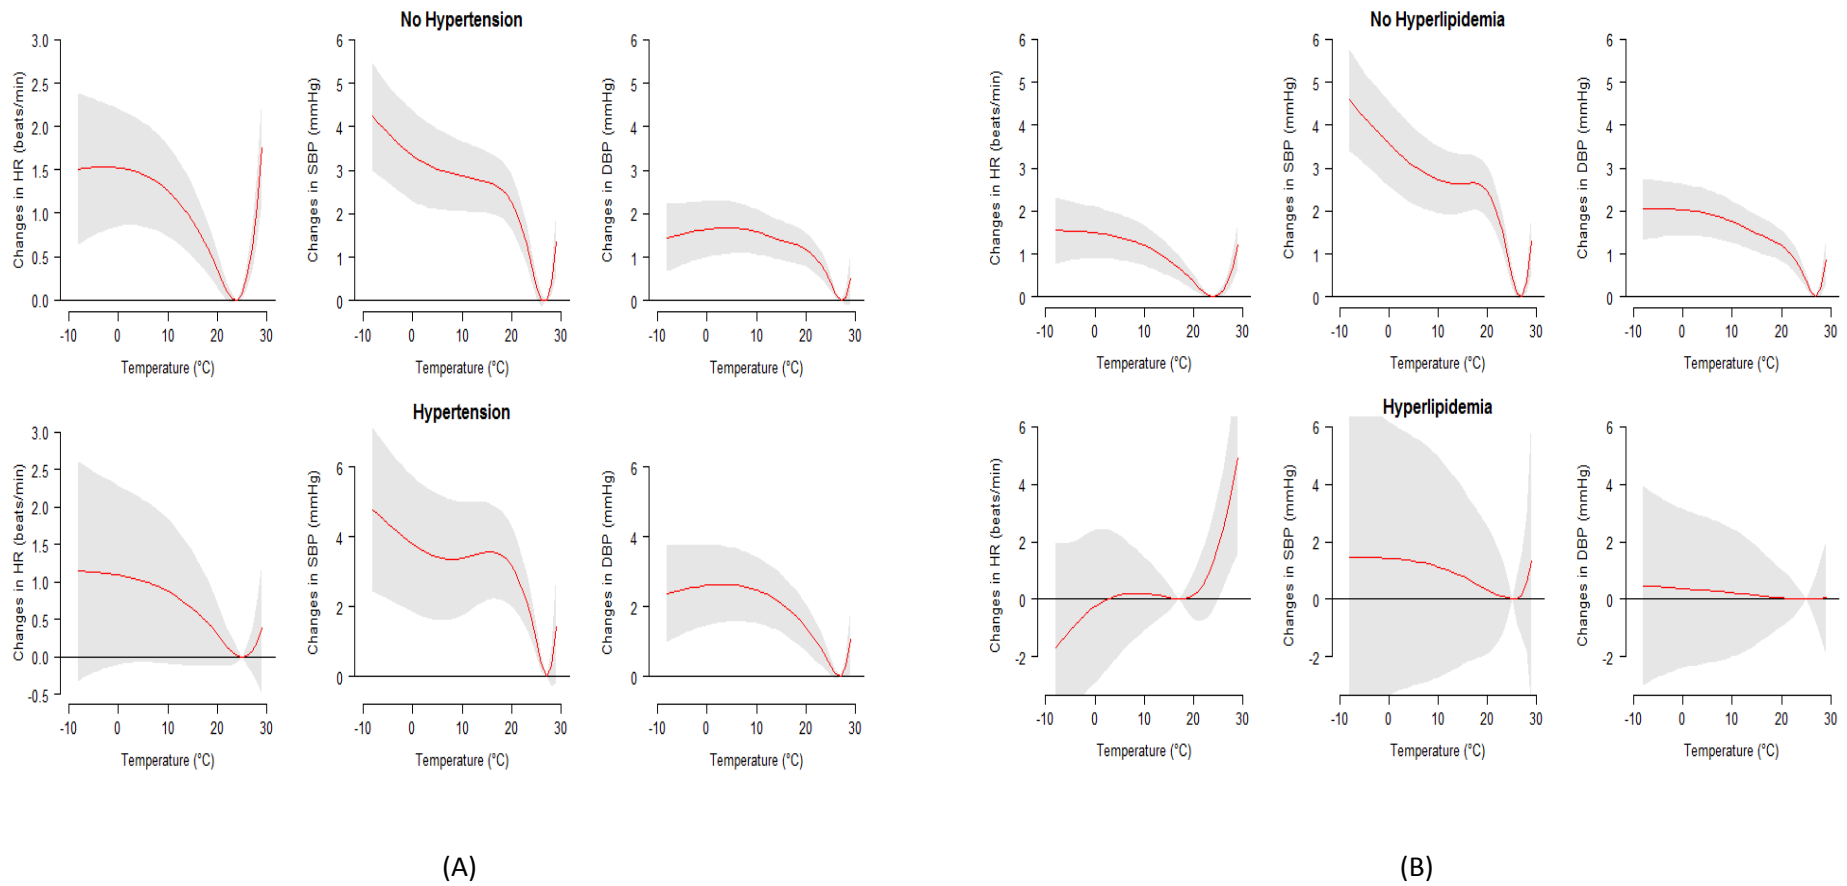

Figure S6. The estimated effects of 3-day moving average of mean temperature on HR, SBP and DBP among people with and without hypertension (A) and people with and without hyperlipidemia (B)
